# Supplementary material for: High-Throughput Label-Free Isolation of Heterogeneous Circulating Tumor Cells and CTC Clusters from Non-Small-Cell Lung Cancer Patients
Source: PubMed Central journal article supplement (PMC7016759; doi:10.3390/cancers12010127), 2020-01-03
Supplement: cancers-12-00127-s001.pdf [file cancers-12-00127-s001.pdf]

## Supplementary Materials: High Throughput Label-Free Isolation of Heterogeneous Circulating Tumor Cells (CTCs) and CTC Clusters from Non-small Cell Lung Cancer (NSCLC) Patients

### Isolation of CTCs from NSCLC patients (n=25) and healthy controls (n=3)

Using Labyrinth, CTCs were isolated from peripheral blood samples collected from 25 metastatic NSCLC patients along with healthy controls (n = 3). Significant differences between the overall number of CTCs in NSCLC patients samples (417±1023 per mL) vs. healthy controls (1±1.7 per mL) was observed ( $p = 0.0006$ ). Mann-Whitney unpaired t-test analysis was used for comparing patient cohort vs. healthy control (Figure S1).

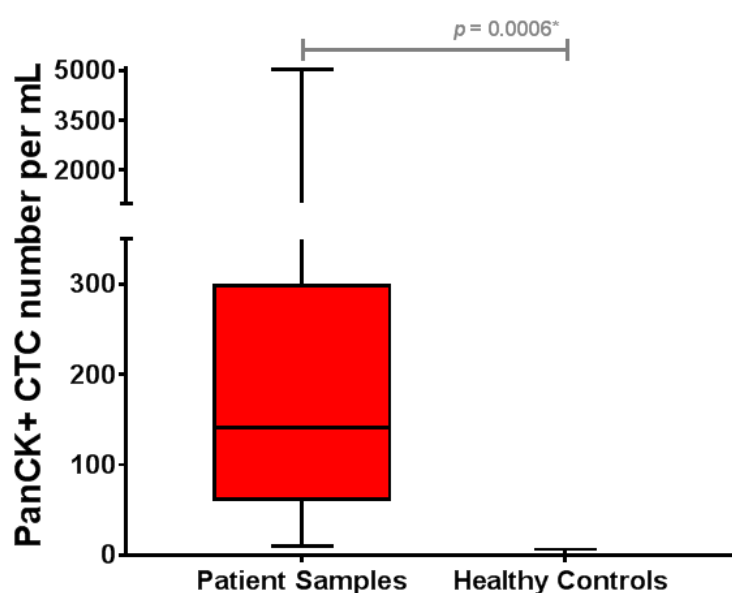

**Figure S1.** Comparison between the total numbers of CTCs/mL in NSCLC patients compared to healthy controls.

### Identification of heterogeneous CTC/clusters subpopulations isolated metastatic NSCLC patients (n=23) using Labyrinth

Using Labyrinth, CTCs were isolated from peripheral blood samples collected from 23 metastatic NSCLC patients. Significantly higher number of EpCAM<sup>-</sup> CTCs were observed (336 CTCs/mL) compared to EpCAM<sup>+</sup> CTCs (96 CTCs/mL) ( $p = 0.01$ ). Checking the mesenchymal phenotype on the recovered CTCs demonstrated that 45% were Vimentin<sup>+</sup> CTCs (346 CTCs/mL), and 55% were Vimentin<sup>-</sup> CTCs (85 CTCs/mL) ( $p = 0.4$ ) (Figure S2A). Analyzing recovered CTC clusters from Labyrinth, we found that significantly higher numbers of CTC clusters did not express EpCAM (EpCAM<sup>-</sup>) ( $p = 0.005$ ) and 41% of clusters expressed the EMT marker, Vimentin ( $p=0.5$ ) (Figure S2B).

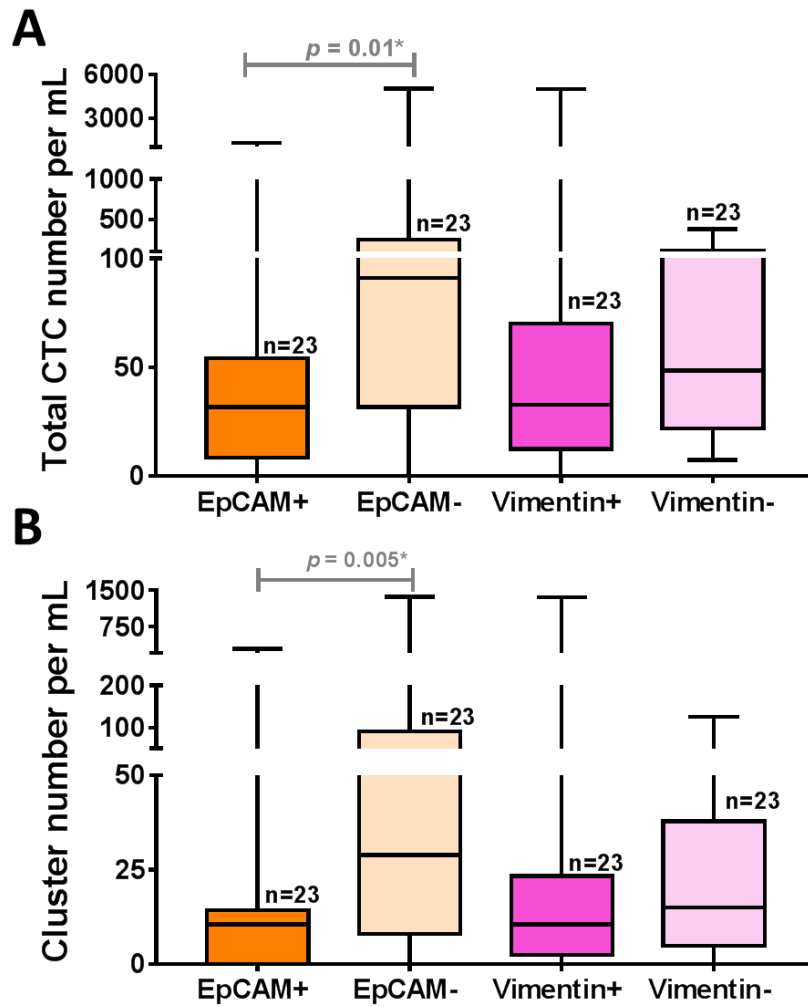

**Figure S2.** Analyzing heterogeneous CTC subpopulations among CTCs and CTC clusters recovered from NSCLC patients (n=23). (A) Significantly higher number of EpCAM- CTCs were observed (336 CTCs/mL) in total CTCs recovered from NSCLC patients compared to EpCAM+ CTCs (96 CTCs/mL) ( $p = 0.01$ ). Checking the mesenchymal phenotype on the recovered CTCs demonstrated that 45% were Vimentin+ CTCs (346 CTCs/mL), and 55% were Vimentin- CTCs (85 CTCs/mL). (B) Analyzing recovered CTC clusters from Labyrinth, we found that significantly higher numbers of CTC clusters were not expressing EpCAM (EpCAM-) ( $p = 0.005$ ), and 41% of CTC clusters expressing the EMT marker, Vimentin. Wilcoxon test analysis was used for comparing between these groups. Analyses were conducted using GraphPad Prism.

**Table S1.** Clinical characterization of patients with NSCLC.

| Sample ID | Gender | Age | Stage | Node status | Tumor | Adenocarcinoma subtype | Smoking status | Mutation                           | Treatment              |
|-----------|--------|-----|-------|-------------|-------|------------------------|----------------|------------------------------------|------------------------|
| P 01      | Female | 39  | IV    | N0          | T2    | ALK                    | No             | ALK mutation                       | Crizotinib             |
| P 02      | Female | 55  | IV    | N3          | T2    | ROS-1                  | 80 PY          | ROS-1 mutation                     | Crizotinib             |
| P 03      | Female | 40  | IV    | N2          | T1    | ROS-1                  | No             | ROS-1 rearrangement                | Crizotinib             |
| P 04      | Male   | 85  | IV    | N1          | T2    | ROS-1                  | 30 PY          | ROS-1 rearrangement                | Crizotinib             |
| P 05      | Female | 78  | IV    | N2          | T3    | EGFR                   | No             | EGFR mutant AC with T790M mutation | Osimertinib            |
| P 06      | Female | 49  | IV    | N0          | T4    | EGFR                   | 25 PY          | T790M mutation                     | Osimertinib            |
| P 07      | Female | 77  | IV    | N1          | T3    | EGFR                   | No             | EGFR mutant AC                     | Erlotinib              |
| P 08      | Male   | 81  | IV    | N2          | T1    | EGFR                   | No             | EGFR mutant AC                     | Afatinib               |
| P 09      | Female | 43  | IV    | N2          | T2    | ROS-1                  | No             | ROS-1 mutation                     | Crizotinib             |
| P 10      | Male   | 58  | IV    | N0          | T3    | ROS-1                  | No             | ROS-1 mutation                     | Crizotinib             |
| P 11      | Male   | 60  | IV    | N0          | T2    | Alk                    | 23 PY          | ALK translocation +                | Crizotinib             |
| P 12      | Female | 57  | IV    | N0          | T4    | EGFR                   | 5 PY           | EGFR mutation                      | Erlotinib and Zometa   |
| P 13      | Male   | 62  | IV    | N2          | T3    | EGFR                   | No             | EGFR mutation                      | Afatinib               |
| P 14      | Female | 58  | IV    | N0          | T2    | EGFR                   | 5 PY           | EGFR mutation                      | Pemetrexed             |
| P 15      | Female | 61  | IV    | N0          | T2    | EGFR                   | 10 PY          | EGFR exon 19 deletion              | Tarceva                |
| P 16      | Female | 80  | IV    | N0          | T2    | EGFR                   | No             | EGFR L858R, T790M                  | Osimertinib            |
| P 17      | Male   | 58  | IV    | Nx          | T3    | ALK                    | No             | TTF-1, Napsin, ALK positive        | Crizotinib             |
| P 18      | Female | 61  | IV    | N3          | T2    | EGFR                   | No             | EGFR L858R, T790M                  | Osimertinib            |
| P 19      | Male   | 50  | IV    | N2          | T2    | ALK                    | Former         | ALK EML-4 fusion                   | Alectinib              |
| P 20      | Female | 45  | IV    | N3          | T4    | EGFR                   | Former         | EGFR, Exon 19 deletion, PDL1 10%   | Tagrisso               |
| P 21      | Female | 63  | IV    | N3          | T3    | ROS-1                  | No             | ROS-1                              | Carboplatin/Pemetrexed |
| P 22      | Male   | 72  | IV    | NA          | NA    | EGFR                   | Former         | EGFR exon 19 deletion, T790M       | Tagrisso               |
| P 23      | Male   | 70  | IV    | N0          | T2a   | EGFR                   | Former         | EGFR Exon 19 deletion              | Tagrisso               |
| P 24      | Female | 70  | IV    | N3          | T1a   | EGFR                   | Former         | EGFR Exon 19 deletion              | Tagrisso               |
| P 25      | Male   | 66  | IV    | N0          | T1a   | EGFR                   | No             | EGFR Exon 19 deletion              | Tagrisso               |

|       |        |    |    |    |     |     |    |              |           |
|-------|--------|----|----|----|-----|-----|----|--------------|-----------|
| P 26* | Female | 43 | IV | N0 | T2A | RET | No | RET mutation | Alectinib |
|-------|--------|----|----|----|-----|-----|----|--------------|-----------|

NA: Not available. \* Discarded from the analysis due to the different sample processing. AC: Adenocarcinoma

**Table S2.** CTC enumeration in patients with NSCLC.

| Sample ID | CTCs  | EpCAM+ CTCs | Vimentin+ CTCs | Double+ CTCs | Single CTCs | Number of CTCs in clusters | Total CTCs |
|-----------|-------|-------------|----------------|--------------|-------------|----------------------------|------------|
| P 01      | 121.4 | 0.0         | 11.3           | 8.5          | 2.8         | 138.4                      | 141.2      |
| P 02      | 34.4  | 0.0         | 7.4            | 54.0         | 27.0        | 68.7                       | 95.7       |
| P 03      | 96.9  | 14.2        | 23.6           | 33.1         | 26.0        | 141.8                      | 167.8      |
| P 04      | 100.9 | 38.2        | 30.0           | 2.7          | 65.5        | 106.4                      | 171.8      |
| P 05      | 366.7 | 10.0        | 0.0            | 0.0          | 95.4        | 281.3                      | 376.7      |
| P 06*     | 177.6 | NA          | NA             | NA           | 38.4        | 139.2                      | 177.6      |
| P 07      | 24.0  | 0.0         | 57.6           | 122.4        | 24.0        | 180.0                      | 204.0      |
| P 08      | 17.0  | 0.0         | 2.4            | 12.1         | 4.8         | 26.7                       | 31.5       |
| P 09*     | 317.0 | NA          | NA             | NA           | 34.7        | 282.3                      | 317.0      |
| P 10      | 0.0   | 7.5         | 0.0            | 7.5          | 15.1        | 0.0                        | 15.1       |
| P 11      | 331.6 | 0.0         | 0.0            | 31.6         | 47.4        | 315.8                      | 363.2      |
| P 12      | 189.3 | 5.2         | 59.6           | 25.9         | 7.8         | 272.2                      | 280.0      |
| P 13      | 31.6  | 0.0         | 0.0            | 7.9          | 21.1        | 18.5                       | 39.5       |
| P 14      | 21.8  | 0.0         | 9.5            | 2.7          | 17.7        | 16.4                       | 34.1       |
| P 15      | 42.4  | 4.4         | 0.0            | 5.9          | 30.7        | 22.0                       | 52.7       |
| P 16      | 7.3   | 0.0         | 1.5            | 1.5          | 4.4         | 5.8                        | 10.2       |
| P 17      | 71.3  | 0.0         | 11.3           | 56.3         | 97.5        | 41.3                       | 138.8      |
| P 18      | 38.5  | 0.0         | 52.5           | 0.0          | 31.5        | 59.5                       | 91.0       |
| P 19      | 6.4   | 6.4         | 22.4           | 35.2         | 16.0        | 54.4                       | 70.4       |
| P 20      | 82.5  | 0.0         | 20.6           | 4.1          | 4.1         | 103.1                      | 107.3      |
| P 21      | 41.6  | 6.9         | 263.5          | 239.2        | 20.8        | 530.4                      | 551.2      |
| P 22      | 24.0  | 60.0        | 12.0           | 16.0         | 60.0        | 52.0                       | 112.0      |
| P 23      | 17.5  | 0.0         | 336.0          | 1305.5       | 45.5        | 1613.5                     | 1659.0     |
| P 24      | 70.0  | 0.0         | 4959.5         | 38.5         | 10.5        | 5057.5                     | 5068.0     |
| P 25      | 65.3  | 9.3         | 37.3           | 32.7         | 23.3        | 121.3                      | 144.7      |
| HC 1      | 3.0   | 0.0         | 0.0            | 0.0          | 3.0         | 0.0                        | 3.0        |
| HC 2      | 0.0   | 0.0         | 0.0            | 0.0          | 0.0         | 0.0                        | 0.0        |
| HC 3      | 0.0   | 0.0         | 0.0            | 0.0          | 0.0         | 0.0                        | 0.0        |

\* Analyzed for PanCK CTC only. NA: Not available

**Table S3.** Single CTC and CTC cluster enumeration in patients with NSCLC.

| Sample ID | Single CTCs |             |                |              |            | CTC Cluster CTC >/2 |                     |                        |                      |                    |
|-----------|-------------|-------------|----------------|--------------|------------|---------------------|---------------------|------------------------|----------------------|--------------------|
|           | CTCs        | EpCAM+ CTCs | Vimentin+ CTCs | Double+ CTCs | Total CTCs | CTC Clusters        | EpCAM+ CTC Clusters | Vimentin+ CTC Clusters | Double+ CTC Clusters | Total CTC Clusters |
| P 01      | 0.0         | 0.0         | 2.8            | 0.0          | 2.8        | 48.0                | 0.0                 | 2.8                    | 2.8                  | 53.6               |
| P 02      | 7.4         | 0.0         | 0.0            | 19.6         | 27.0       | 9.8                 | 0.0                 | 2.5                    | 14.7                 | 27.0               |
| P 03      | 18.9        | 2.4         | 0.0            | 4.7          | 26.0       | 33.1                | 4.7                 | 7.1                    | 9.5                  | 54.4               |
| P 04      | 46.4        | 8.2         | 8.2            | 2.7          | 65.5       | 27.3                | 13.6                | 10.9                   | 0.0                  | 51.8               |
| P 05      | 95.4        | 0.0         | 0.0            | 0.0          | 95.4       | 120.6               | 5.0                 | 0.0                    | 0.0                  | 125.6              |
| P 06*     | 38.4        | NA          | NA             | NA           | 38.4       | 55.2                | NA                  | NA                     | NA                   | 55.2               |
| P 07      | 4.8         | 0.0         | 2.4            | 16.8         | 24.0       | 7.2                 | 0.0                 | 21.6                   | 40.8                 | 69.6               |
| P 08      | 2.4         | 0.0         | 2.4            | 0.0          | 4.8        | 4.8                 | 0.0                 | 0.0                    | 2.4                  | 7.3                |
| P 09*     | 34.7        | NA          | NA             | NA           | 34.7       | 106.5               | NA                  | NA                     | NA                   | 106.5              |
| P 10      | 0.0         | 7.5         | 0.0            | 7.5          | 15.1       | 0.0                 | 0.0                 | 0.0                    | 0.0                  | 0.0                |
| P 11      | 36.8        | 0.0         | 0.0            | 10.5         | 47.4       | 110.5               | 0.0                 | 0.0                    | 10.5                 | 121.1              |
| P 12      | 2.6         | 0.0         | 5.2            | 0.0          | 7.8        | 72.6                | 2.6                 | 18.1                   | 10.4                 | 103.7              |
| P 13      | 13.2        | 0.0         | 0.0            | 7.9          | 21.1       | 7.9                 | 0.0                 | 0.0                    | 0.0                  | 7.9                |
| P 14      | 16.4        | 0.0         | 1.4            | 0.0          | 17.7       | 2.7                 | 0.0                 | 4.1                    | 1.4                  | 8.2                |
| P 15      | 20.5        | 4.4         | 0.0            | 5.9          | 30.7       | 10.2                | 0.0                 | 0.0                    | 0.0                  | 10.2               |
| P 16      | 1.5         | 0.0         | 1.5            | 1.5          | 4.4        | 2.9                 | 0.0                 | 0.0                    | 0.0                  | 2.9                |
| P 17      | 37.5        | 0.0         | 11.3           | 48.8         | 97.5       | 15.0                | 0.0                 | 0.0                    | 3.8                  | 18.8               |
| P 18      | 14.0        | 0.0         | 17.5           | 0.0          | 31.5       | 10.5                | 0.0                 | 17.5                   | 0.0                  | 28.0               |
| P 19      | 6.4         | 0.0         | 0.0            | 9.6          | 16.0       | 0.0                 | 3.2                 | 6.4                    | 9.6                  | 19.2               |
| P 20      | 0.0         | 0.0         | 0.0            | 4.1          | 4.1        | 24.8                | 0.0                 | 8.3                    | 0.0                  | 33.0               |
| P 21      | 3.5         | 0.0         | 0.0            | 17.3         | 20.8       | 17.3                | 3.5                 | 83.2                   | 58.9                 | 162.9              |
| P 22      | 16.0        | 32.0        | 4.0            | 8.0          | 60.0       | 4.0                 | 12.0                | 4.0                    | 4.0                  | 24.0               |
| P 23      | 3.5         | 0.0         | 3.5            | 38.5         | 45.5       | 3.5                 | 0.0                 | 101.5                  | 294.0                | 399.0              |
| P 24      | 3.5         | 0.0         | 7.0            | 0.0          | 10.5       | 21.0                | 0.0                 | 1344.0                 | 14.0                 | 1379.0             |
| P 25      | 9.3         | 9.3         | 4.7            | 0.0          | 23.3       | 23.3                | 0.0                 | 9.3                    | 14.0                 | 46.7               |

\* Analyzed for PanCK CTC only. NA: Not available.
